# Supplementary material
Source: PubMed Central journal article supplement (PMC3493162)

## SUPPLEMENTARY INFORMATION

### Table S1

The HX time-courses (pD 7.3, 5°C) of 51 lipid-free apoA-I<sub>WT</sub> and apoA-I<sub>Iowa</sub> peptide fragments were fitted with one or two exponentials and the estimated protection factors (Pf) are tabulated. Because the different hydrogens in a given segment have a range of unprotected HX rates, the curves are drawn to fit a stretched exponential (stretching factor ~0.8). If the best-fit is a mono-exponential equation there is one protection factor and if the best-fit is a bi-exponential equation there are two protection factors, one for the fast initial phase (Phase I) and one for the second slower phase (Phase II). The overall Pf for such fragments is calculated as an average of the two values weighted for the number of residues in each phase. Certain apoA-I<sub>Iowa</sub> peptides (residues 17-46, 114-126 and 127-158) give rise to bimodal mass spectra (Fig. S1). The two populations exhibiting fast and slow HX kinetics are analyzed separately and designated as “fast” and “slow” in the table. The Pf values for these peptides are derived from time-courses of deuterium incorporation like those shown in Fig. 2b. The Pf can be underestimated in cases where the EX1 contribution to HX is calculated as EX2 behavior.

Table S1

| Residues          | Total amides | Fast residues | Slow residues | Intrinsic Rate | Stretch-factor | pf(I) | pf(II) |
|-------------------|--------------|---------------|---------------|----------------|----------------|-------|--------|
| WT:3-16           | 11           | 6             | 5             | 22.0           | 0.83           | 13    | 3826   |
| Iowa:3-16         | 11           | --            | --            | 22.0           | 0.83           | 15    | --     |
| WT:3-17           | 12           | 6             | 6             | 21.0           | 0.83           | 12    | 4622   |
| Iowa:3-17         | 12           | 11            | 1             | 21.0           | 0.83           | 15    | --     |
| WT:17-32          | 14           | 3             | 11            | 22.5           | 0.71           | 15    | 1524   |
| Iowa:17-32        | 14           | --            | --            | 22.5           | 0.71           | 16    | --     |
| WT:17-46          | 28           | 14            | 14            | 27.1           | 0.74           | 35    | 1556   |
| Iowa:17-46 (slow) | 28           | 14            | 14            | 27.1           | 0.74           | 34    | --     |
| Iowa:17-46 (fast) | 28           | 14            | 14            | 27.1           | 0.74           | 10    | --     |
| WT:34-44          | 9            | 5             | 4             | 40.1           | 0.77           | 40    | 678    |
| Iowa:34-44        | 9            | --            | --            | 40.1           | 0.77           | 21    | --     |
| WT:34-46          | 11           | 6             | 5             | 33.8           | 0.77           | 24    | 509    |
| Iowa:34-46        | 11           | --            | --            | 33.8           | 0.77           | 25    | --     |
| WT:45-56          | 10           | --            | --            | 28.0           | 0.73           | 7     | --     |
| Iowa:45-56        | 10           | --            | --            | 27.9           | 0.73           | 5     | --     |
| WT:51-60          | 8            | 6             | 2             | 42.4           | 0.76           | 12    | 5311   |
| Iowa:51-60        | 8            | --            | --            | 42.4           | 0.76           | 4     | --     |
| WT:51-71          | 18           | 10            | 8             | 29.0           | 0.79           | 15    | 3023   |
| Iowa:51-71        | 18           | 8             | 10            | 29.0           | 0.79           | 4     | 87     |
| WT:61-71          | 8            | 4             | 4             | 21.7           | 0.83           | 21    | 3319   |
| Iowa:61-71        | 8            | 3             | 5             | 21.7           | 0.83           | 4     | 70     |
| WT:72-89          | 16           | 6             | 10            | 29.6           | 0.82           | 62    | 9856   |
| Iowa:72-89        | 16           | 10            | 6             | 29.6           | 0.82           | 31    | 393    |
| WT:72-91          | 18           | 6             | 12            | 24.7           | 0.79           | 31    | 9037   |
| Iowa:72-91        | 18           | 11            | 7             | 24.7           | 0.79           | 22    | 344    |
| WT:72-92          | 19           | 6             | 13            | 23.2           | 0.79           | 43    | 9226   |
| Iowa:72-92        | 19           | 12            | 7             | 23.2           | 0.79           | 16    | 332    |
| WT:72-103         | 29           | 8             | 21            | 20.7           | 0.81           | 46    | 9327   |
| Iowa:72-103       | 29           | 15            | 14            | 20.7           | 0.81           | 60    | 839    |
| WT:76-89          | 12           | 4             | 8             | 32.5           | 0.84           | 34    | 12917  |
| Iowa:76-89        | 12           | 7             | 5             | 32.5           | 0.84           | 30    | 393    |
| WT:76-91          | 14           | 4             | 10            | 25.2           | 0.80           | 34    | 13905  |
| Iowa:76-91        | 14           | 8             | 6             | 25.2           | 0.80           | 23    | 429    |
| WT:76-92          | 15           | 5             | 10            | 23.3           | 0.79           | 16    | 14026  |
| Iowa:76-92        | 15           | 9             | 6             | 23.3           | 0.79           | 19    | 361    |
| WT:76-103         | 25           | 6             | 19            | 20.4           | 0.81           | 18    | 11768  |
| Iowa:76-103       | 25           | 11            | 14            | 20.4           | 0.81           | 36    | 756    |
| WT:90-103         | 11           | 4             | 7             | 15.9           | 0.87           | 121   | 4190   |
| Iowa:90-103       | 11           | 4             | 7             | 15.9           | 0.87           | 90    | 871    |

| <b>Residues</b>            | <b>Total amides</b> | <b>Fast residues</b> | <b>Slow residues</b> | <b>Intrinsic Rate</b> | <b>Stretch-factor</b> | <b>pf(I)</b> | <b>pf(II)</b> |
|----------------------------|---------------------|----------------------|----------------------|-----------------------|-----------------------|--------------|---------------|
| <b>WT:92-103</b>           | 9                   | 2                    | 7                    | 19.2                  | 0.89                  | 226          | 11237         |
| <b>lowa:92-103</b>         | 9                   | --                   | --                   | 19.2                  | 0.89                  | 547          | --            |
| <b>WT:92-104</b>           | 10                  | 1                    | 9                    | 18.9                  | 0.89                  | 16           | 7663          |
| <b>lowa:92-104</b>         | 10                  | 3                    | 7                    | 18.9                  | 0.89                  | 81           | 875           |
| <b>WT:93-103</b>           | 8                   | 1                    | 7                    | 18.4                  | 0.88                  | 13           | 6240          |
| <b>lowa:93-103</b>         | 8                   | 4                    | 4                    | 18.4                  | 0.88                  | 144          | 1237          |
| <b>WT:93-104</b>           | 9                   | 1                    | 8                    | 18.1                  | 0.89                  | 7            | 6423          |
| <b>lowa:93-104</b>         | 9                   | 2                    | 7                    | 18.1                  | 0.89                  | 18           | 764           |
| <b>WT:96-103</b>           | 5                   | 1                    | 4                    | 15.5                  | 0.95                  | 0            | 6295          |
| <b>lowa:96-103</b>         | 5                   | --                   | --                   | 15.5                  | 0.95                  | 276          | --            |
| <b>WT:104-113</b>          | 8                   | 1                    | 7                    | 24.6                  | 0.88                  | 8            | 6958          |
| <b>lowa:104-113</b>        | 8                   | --                   | --                   | 24.6                  | 0.88                  | 2001         | --            |
| <b>WT:104-114</b>          | 9                   | 1                    | 8                    | 21.3                  | 0.86                  | 0            | 3568          |
| <b>lowa:104-114</b>        | 9                   | 1                    | 8                    | 21.3                  | 0.86                  | 0            | 1577          |
| <b>WT:114-124</b>          | 8                   | --                   | --                   | 23.4                  | 0.73                  | 15           | --            |
| <b>lowa:114-124 (slow)</b> | 8                   | --                   | --                   | 23.4                  | 0.73                  | 468          | --            |
| <b>lowa:114-124 (fast)</b> | 8                   | --                   | --                   | 23.4                  | 0.73                  | 15           | --            |
| <b>WT:114-126</b>          | 10                  | --                   | --                   | 19.2                  | 0.74                  | 10           | --            |
| <b>lowa:114-126 (slow)</b> | 10                  | --                   | --                   | 19.2                  | 0.74                  | 240          | --            |
| <b>lowa:114-126 (fast)</b> | 10                  | --                   | --                   | 19.2                  | 0.74                  | 8            | --            |
| <b>WT:125-158</b>          | 31                  | 24                   | 7                    | 30.7                  | 0.80                  | 8            | 6384          |
| <b>lowa:125-158 (slow)</b> | 31                  | 23                   | 8                    | 30.7                  | 0.80                  | 6            | 613           |
| <b>lowa:125-158 (fast)</b> | 31                  | --                   | --                   | 30.7                  | 0.80                  | 6            | --            |
| <b>WT:127-158</b>          | 29                  | 22                   | 7                    | 31.1                  | 0.79                  | 7            | 5387          |
| <b>lowa:127-158 (slow)</b> | 29                  | --                   | --                   | 31.1                  | 0.79                  | 623          | --            |
| <b>lowa:127-158 (fast)</b> | 29                  | 21                   | 8                    | 31.1                  | 0.79                  | 6            | 623           |
| <b>WT:155-169</b>          | 12                  | 4                    | 8                    | 28.2                  | 0.75                  | 22           | 12157         |
| <b>lowa:155-169</b>        | 12                  | 8                    | 4                    | 28.2                  | 0.75                  | 29           | 1030          |
| <b>WT:159-169</b>          | 8                   | 2                    | 6                    | 35.8                  | 0.70                  | 30           | 7295          |
| <b>lowa:159-169</b>        | 8                   | 5                    | 3                    | 35.8                  | 0.70                  | 27           | 645           |
| <b>WT:159-170</b>          | 9                   | 2                    | 7                    | 28.8                  | 0.68                  | 15           | 8652          |
| <b>lowa:159-170</b>        | 9                   | 4                    | 5                    | 28.8                  | 0.68                  | 16           | 308           |
| <b>WT:159-174</b>          | 13                  | 2                    | 11                   | 31.8                  | 0.72                  | 224          | 15603         |
| <b>lowa:159-174</b>        | 13                  | 5                    | 8                    | 31.8                  | 0.72                  | 31           | 851           |
| <b>WT:159-176</b>          | 15                  | 3                    | 12                   | 31.8                  | 0.74                  | 9            | 7312          |
| <b>lowa:159-176</b>        | 15                  | 5                    | 10                   | 31.8                  | 0.74                  | 21           | 792           |
| <b>WT:159-180</b>          | 19                  | 2                    | 17                   | 28.6                  | 0.76                  | 19           | 12024         |
| <b>lowa:159-180</b>        | 19                  | 8                    | 11                   | 28.6                  | 0.76                  | 82           | 1064          |
| <b>WT:160-169</b>          | 7                   | 1                    | 6                    | 33.7                  | 0.69                  | 6            | 4946          |
| <b>lowa:160-169</b>        | 7                   | 4                    | 3                    | 33.7                  | 0.69                  | 18           | 784           |

| <b>Residues</b>     | <b>Total amides</b> | <b>Fast residues</b> | <b>Slow residues</b> | <b>Intrinsic Rate</b> | <b>Stretch-factor</b> | <b>pf(I)</b> | <b>pf(II)</b> |
|---------------------|---------------------|----------------------|----------------------|-----------------------|-----------------------|--------------|---------------|
| <b>WT:179-189</b>   | 9                   | 9                    | --                   | 37.2                  | 0.74                  | 7            | --            |
| <b>Iowa:179-189</b> | 9                   | 9                    | --                   | 37.2                  | 0.74                  | 6            | --            |
| <b>WT:190-213</b>   | 21                  | --                   | --                   | 33.29                 | 0.77                  | 1            | --            |
| <b>Iowa:190-213</b> | 21                  | --                   | --                   | 33.2                  | 0.77                  | 1            | --            |
| <b>WT:212-219</b>   | 6                   | --                   | --                   | 20.4                  | 0.68                  | 9            | --            |
| <b>Iowa:212-219</b> | 6                   | --                   | --                   | 20.4                  | 0.68                  | 6            | --            |
| <b>WT:212-222</b>   | 8                   | --                   | --                   | 14.1                  | 0.68                  | 7            | --            |
| <b>Iowa:212-222</b> | 8                   | --                   | --                   | 14.1                  | 0.68                  | 5            | --            |
| <b>WT:212-225</b>   | 11                  | --                   | --                   | 16.4                  | 0.69                  | 3            | --            |
| <b>Iowa:212-225</b> | 11                  | --                   | --                   | 16.4                  | 0.69                  | 4            | --            |
| <b>WT:213-222</b>   | 7                   | --                   | --                   | 16.0                  | 0.67                  | 8            | --            |
| <b>Iowa:213-222</b> | 7                   | --                   | --                   | 16.0                  | 0.67                  | 6            | --            |
| <b>WT:213-225</b>   | 10                  | --                   | --                   | 18.2                  | 0.68                  | 5            | --            |
| <b>Iowa:213-225</b> | 10                  | --                   | --                   | 18.2                  | 0.68                  | 5            | --            |
| <b>WT:214-222</b>   | 6                   | --                   | --                   | 14.2                  | 0.64                  | 8            | --            |
| <b>Iowa:214-222</b> | 6                   | --                   | --                   | 14.2                  | 0.64                  | 6            | --            |
| <b>WT:214-225</b>   | 9                   | --                   | --                   | 17.1                  | 0.66                  | 6            | --            |
| <b>Iowa:214-225</b> | 9                   | --                   | --                   | 17.1                  | 0.66                  | 7            | --            |
| <b>WT:215-225</b>   | 8                   | --                   | --                   | 14.8                  | 0.68                  | 4            | --            |
| <b>Iowa:215-225</b> | 8                   | --                   | --                   | 14.8                  | 0.68                  | 4            | --            |
| <b>WT:226-232</b>   | 5                   | --                   | --                   | 42.1                  | 0.80                  | 23           | --            |
| <b>Iowa:226-232</b> | 5                   | --                   | --                   | 42.1                  | 0.80                  | 14           | --            |
| <b>WT:233-243</b>   | 9                   | --                   | --                   | 26.9                  | 0.78                  | 10           | --            |
| <b>Iowa:233-243</b> | 9                   | --                   | --                   | 26.9                  | 0.78                  | 9            | --            |
| <b>WT:234-243</b>   | 8                   | --                   | --                   | 31.8                  | 0.81                  | 12           | --            |
| <b>Iowa:234-243</b> | 8                   | --                   | --                   | 31.8                  | 0.81                  | 11           | --            |
| <b>WT:236-243</b>   | 6                   | --                   | --                   | 35.3                  | 0.79                  | 12           | --            |
| <b>Iowa:236-243</b> | 6                   | --                   | --                   | 35.3                  | 0.79                  | 11           | --            |

Table S2

The HX time-courses (pD 7.3, 5°C) of 41 lipid-free apoA-I<sub>WT</sub> and apoA-I<sub>MII</sub> peptide fragments were analyzed as described in Table S1.

Table S2

| Residues              | Total amides | Fast residues | Slow residues | Intrinsic Rate | Stretch-factor | pf(I) | pf(II) |
|-----------------------|--------------|---------------|---------------|----------------|----------------|-------|--------|
| Milano: -2-16         | 11           | 7             | 5             | 19.8           | 0.80           | 5     | 980    |
| WT:17-46              | 28           | 14            | 14            | 27.1           | 0.74           | 35    | 1556   |
| Milano:17-46(slow)    | 28           | 18            | 10            | 27.1           | 0.74           | 24    | 1946   |
| Milano:17-46(Fast)    | 28           | 20            | 8             | 27.1           | 0.74           | 1     | 22     |
| WT:19-46              | 26           | 14            | 12            | 29.3           | 0.74           | 34    | 1757   |
| Milano:19-46(slow)    | 26           | 15            | 11            | 29.3           | 0.74           | 31    | 2429   |
| Milano:19-46(Fast)    | 26           | 26            |               | 29.3           | 0.74           | 6     | --     |
| WT:29-46              | 16           | 8             | 8             | 36.3           | 0.78           | 28    | 728    |
| Milano:29-46(slow)    | 16           | 9             | 7             | 36.3           | 0.78           | 24    | 1639   |
| Milano:29-46(Fast)    | 16           | 15            | 1             | 36.3           | 0.78           | 4     | 94     |
| WT:47-56              | 8            | 8             |               | 40.4           | 0.79           | 6     | --     |
| Milano:47-56          | 8            | 8             |               | 40.4           | 0.79           | 5     | --     |
| WT:51-71              | 18           | 10            | 8             | 29.0           | 0.79           | 15    | 3023   |
| Milano:51-71 (Slow)   | 18           | 8             | 10            | 29.0           | 0.79           | 16    | 4911   |
| Milano:51-71 (Fast)   | 18           | 12            | 6             | 29.0           | 0.79           | 1     | 60     |
| Milano:57-70(slow)    | 11           | 6             | 5             | 24.1           | 0.83           | 198   | 5438   |
| Milano:57-70(Fast)    | 11           | 11            |               | 24.1           | 0.83           | 12    | --     |
| WT:61-71              | 8            | 4             | 4             | 21.7           | 0.83           | 21    | 3319   |
| Milano:61-71(slow)    | 8            | 5             | 3             | 21.7           | 0.83           | 20    | 4143   |
| Milano:61-71(Fast)    | 8            | 6             | 2             | 21.7           | 0.83           | 1     | 321    |
| WT:72-103             | 29           | 8             | 21            | 20.7           | 0.81           | 46    | 9327   |
| Milano:72-103(slow)   | 29           | 23            | 6             | 20.7           | 0.81           | 132   | 13547  |
| Milano:72-103(Fast)   | 29           | 19            | 10            | 20.7           | 0.81           | 1     | 241    |
| WT:104-113            | 8            | 1             | 7             | 24.6           | 0.88           | 8     | 6958   |
| Milano:104-113        | 8            | 5             | 3             | 24.6           | 0.88           | 868   | 8373   |
| WT:114-126            | 10           | 10            | --            | 19.2           | 0.74           | 10    | --     |
| Milano:114-126 (slow) | 10           | 8             | 2             | 19.2           | 0.74           | 89    | 769    |
| Milano:114-126 (Fast) | 10           | 8             | 2             | 19.2           | 0.74           | 5     | 155    |
| WT:125-158            | 31           | 24            | 7             | 30.7           | 0.80           | 8     | 6384   |
| Milano:125-158 (slow) | 31           | 3             | 28            | 30.7           | 0.80           | 1     | 1813   |
| Milano:125-158 (Fast) | 31           | 22            | 9             | 30.7           | 0.80           | 6     | 6091   |
| WT:159-169            | 8            | 2             | 6             | 35.8           | 0.70           | 30    | 7295   |
| Milano:159-169 (slow) | 8            | 8             | --            | 35.8           | 0.70           | 13754 | --     |
| Milano:159-169 (Fast) | 8            | 6             | 2             | 35.8           | 0.70           | 4     | 3584   |
| Milano:170-174        | 3            | 3             | --            | 44.9           | 0.80           | 24734 | --     |
| Milano:175-189        | 13           | 6             | 7             | 30.0           | 0.75           | 4     | 24997  |
| WT:179-202            | 22           | 22            | --            | 41.0           | 0.76           | 9     | --     |
| Milano:179-202        | 22           | 22            | --            | 41.0           | 0.76           | 5     | --     |
| WT:181-189            | 7            | 7             | --            | 53.0           | 0.79           | 7     | --     |

| Residues       | Total amides | Fast residues | Slow residues | Intrinsic Rate | Stretch-factor | pf(I) | pf(II) |
|----------------|--------------|---------------|---------------|----------------|----------------|-------|--------|
| Milano:181-189 | 7            | 7             | --            | 53.0           | 0.79           | 6     | --     |
| WT:203-213     | 8            | 8             | --            | 20.3           | 0.88           | 7     | --     |
| Milano:203-213 | 8            | --            | --            | 20.3           | 0.88           | 8     | --     |
| WT:214-225     | 9            | 9             | --            | 17.1           | 0.66           | 6     | --     |
| Milano:214-225 | 9            | --            | --            | 17.1           | 0.66           | 6     | --     |
| Milano:226-233 | 6            | --            | --            | 31.5           | 0.75           | 5     | --     |
| WT:236-243     | 6            | --            | --            | 35.3           | 0.79           | 12    | --     |
| Milano:233-243 | 9            | --            | --            | 26.9           | 0.78           | 9     | --     |

## Figure S1

Comparison of the mass spectra for apoA-I<sub>WT</sub> and apoA-I<sub>Iowa</sub> peptide fragments 114-126 (charge state +3) and 127-158 (charge state +4 or +5). Isotopic envelopes at different times of deuterium (D) incorporation together with the spectrum of the fully deuterated peptide are shown. The apoA-I<sub>WT</sub> spectra are unimodal but the apoA-I<sub>Iowa</sub> spectra are bimodal. In the latter case where mixed EX1/EX2 HX kinetics occur, the peptide contains two populations of amide hydrogens with fast and slow HX rates and different degrees of incorporation of D. To estimate the fraction of the population in the HX time point samples, the mass spectra were fitted by non-linear regression to a double Gaussian equation (solid line in 0.5 min spectrum) and integrated to obtain peak intensities.



Figure S1

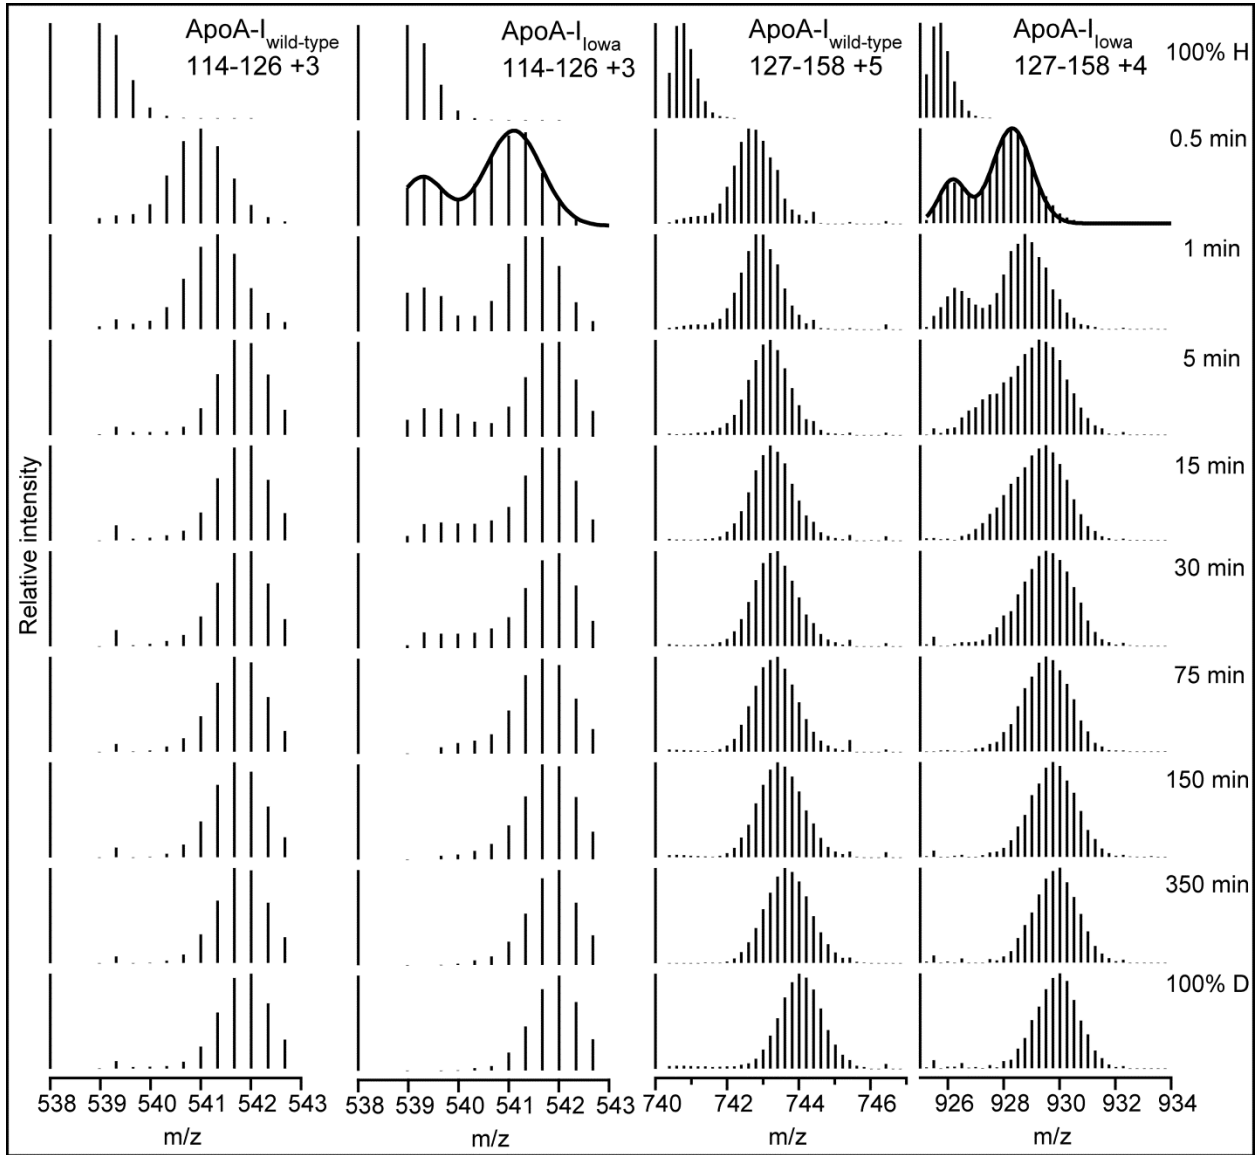

Supplement: NIHMS417546-supplement-1_si_001.pdf [file NIHMS417546-supplement-1_si_001.pdf]
